# Supplementary material
Source: PubMed Central journal article supplement (PMC5142061)
Supplement: CJN.02670316SupplementaryData.pdf [file CJN.02670316SupplementaryData.pdf]

**Title:** *The Associations of Blood Kidney Injury Molecule-1 and Neutrophil Gelatinase-associated Lipocalin with Progression from CKD to ESRD*

**Supplemental Material**

**Supplementary Table 1:** Net reclassification Indices for multivariate biomarkers model for ESRD. Results for whole cohort and patients with CKD 3 only at baseline shown

**Supplementary Table 2:** Multivariate models showing association with risk for all cause mortality

**Supplementary Table 3:** Multivariate models showing association with risk for major non-fatal cardiovascular events

**Supplementary Table 1:** Net reclassification Indices for multivariate biomarkers model for ESRD. Results for whole cohort and patients with CKD 3 only at baseline shown

| <b>Clinical endpoint</b>                                   | <b>3 categories NRI<br/>(95% CI, p value)</b> | <b>Continuous NRI<br/>(95% CI, p value)</b> | <b>IDI<br/>(95% CI, p value)</b>     |
|------------------------------------------------------------|-----------------------------------------------|---------------------------------------------|--------------------------------------|
| <b>ESRD (base model plus KIM-1 and NGAL)</b>               | 0.01<br><br>(-0.018-0.034,<br>p=0.55)         | 0.32<br><br>(0.22-0.43,<br>p<0.001)         | 0.01<br><br>(0.001-0.01,<br>p=0.03,) |
| <b>ESRD (base model plus KIM-1 and NGAL) in CKD 3 only</b> | 0.07<br><br>(-0.05-0.19,<br>p=0.26,)          | 0.64<br><br>(0.37-0.91,<br>p=<0.001,)       | 0.03<br><br>(0.01-0.05, p=0.01,)     |

**Supplementary Table 2:** Multivariate models showing association with risk for all cause mortality

| Variable                                         | Model 1 (Baseline covariates) |         | Model 2 (Baseline covariates plus biomarkers) |         |
|--------------------------------------------------|-------------------------------|---------|-----------------------------------------------|---------|
|                                                  | HR<br>(95%CI)                 | P Value | HR<br>(95% CI)                                | P Value |
| Age (per 5 years)                                | 1.40<br>(1.34-1.47)           | <0.001  | 1.40<br>(1.34-1.47)                           | <0.001  |
| Male gender                                      | 1.33<br>(1.09-1.61)           | 0.004   | 1.29<br>(1.06-1.57)                           | 0.01    |
| Diabetes                                         | 1.36<br>(1.14-1.63)           | 0.001   | 1.33<br>(1.11-1.60)                           | 0.003   |
| Smoker                                           | 1.25<br>(1.03-1.53)           | 0.03    | 1.24<br>(1.02-1.52)                           | 0.03    |
| Heart failure at baseline                        | 1.56<br>(1.27-1.91)           | <0.001  | 1.56<br>(1.27-1.91)                           | <0.001  |
| Prior cardiovascular event                       | 1.18<br>(0.98-1.43)           | 0.08    | 1.21<br>(1.00-1.47)                           | 0.05    |
| Mean systolic blood pressure (per 5mmHg)         | 1.00<br>(0.95-1.05)           | 0.45    | 1.00<br>(0.99-1.05)                           | 0.55    |
| Baseline eGFR (per 5mls/min/1.73m <sup>2</sup> ) | 0.95<br>(0.95-1.00)           | 0.03    | 0.95<br>(0.95-1.05)                           | 0.38    |
| Haemoglobin (per 1g/dL)                          | 0.90<br>(0.86-0.98)           | 0.008   | 0.92<br>(0.87-0.99)                           | 0.02    |
| Albumin (per 0.1g/dL)                            | 0.94<br>(0.92-0.97)           | <0.001  | 0.95<br>(0.93-0.97)                           | <0.001  |
| Phosphate (per 0.5mg/dL)                         | 1.07<br>(1.01-1.15)           | 0.03    | 1.07<br>(1.00-1.14)                           | 0.04    |
| Parathyroid hormone (per 10pg/mL)                | 1.00<br>(0.99-1.00)           | 0.40    | 1.00<br>(1.00-1.00)                           | 0.49    |
| C reactive protein (per 1mg/L)                   | 1.01<br>(1.00-1.01)           | 0.002   | 1.01<br>(1.00-1.01)                           | 0.002   |
| Ln KIM-1 (per 1 SD)                              |                               |         | 1.05<br>(0.94-1.18)                           | 0.38    |

|                    |  |  |                     |      |
|--------------------|--|--|---------------------|------|
| Ln NGAL (per 1 SD) |  |  | 1.10<br>(0.96-1.26) | 0.17 |
|--------------------|--|--|---------------------|------|

**Supplementary Table 3:** Multivariate models showing association with risk for major non-fatal cardiovascular events

| Variable                                            | Model 1 (Baseline covariates) |         | Model 2 (Baseline covariates plus biomarkers) |         |
|-----------------------------------------------------|-------------------------------|---------|-----------------------------------------------|---------|
|                                                     | HR<br>(95%CI)                 | P Value | HR<br>(95% CI)                                | P Value |
| Age (per 5 years)                                   | 1.00<br>(0.95-1.10)           | 0.61    | 1.05<br>(0.95-1.10)                           | 0.59    |
| Diabetes                                            | 1.19<br>(0.84-1.72)           | 0.33    | 1.17<br>(0.81-1.69)                           | 0.41    |
| Heart failure at baseline                           | 1.25<br>(0.84-1.88)           | 0.28    | 1.25<br>(0.84-1.88)                           | 0.27    |
| Prior cardiovascular event                          | 3.74<br>(2.54-5.51)           | <0.001  | 3.77<br>(2.55-5.56)                           | <0.001  |
| Baseline eGFR (per<br>5mls/min/1.73m <sup>2</sup> ) | 0.99<br>(0.98-1.01)           | 0.49    | 0.99<br>(0.98-1.01)                           | 0.61    |
| Albumin (per 0.1g/dL)                               | 0.95<br>(0.90-0.99)           | 0.01    | 0.95<br>(0.91-0.99)                           | 0.03    |
| Parathyroid hormone (per<br>10pg/mL)                | 1.00<br>(0.90-1.00)           | 0.48    | 1.00<br>(0.90-1.00)                           | 0.49    |
| Ln KIM-1 (per 1SD)                                  |                               |         | 1.05<br>(0.85-1.30)                           | 0.62    |
